# Supplementary material for: Study protocol of a randomized controlled trial to test the effect of a smartphone application on oral-health behavior and oral hygiene in adolescents with fixed orthodontic appliances
Source: PubMed Central journal article supplement (PMC5803887; doi:10.1186/s12903-018-0475-9), 2018-02-07
Supplement: 12903_2018_475_MOESM7_ESM.pdf [file 12903_2018_475_MOESM7_ESM.pdf]

De Boelelaan 1117  
1081 HV Amsterdam

postbus 7057  
1007 MB Amsterdam

telefoon 020 444 4444

www.VUmc.nl

prof. dr. C. van Loveren  
ACTA, afd Cariologie Endodontologie Pedodontologie  
Gustav Mahlerlaan 3004  
1081 LA AMSTERDAM

Medisch Ethische Toetsingscommissie  
VU medisch centrum  
voorzitter: prof. dr. J.A. Rauwerda  
intern postadres: BS7, kamer H-565  
telefoon: 020 - 44 45585  
e-mail: [metc@vumc.nl](mailto:metc@vumc.nl)  
website: [www.vumc.nl/metc](http://www.vumc.nl/metc)

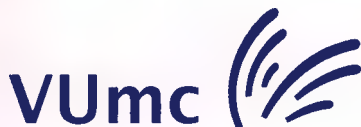

onderwerp  
niet-WMO advies

ons kenmerk  
2016.162

datum  
18 mei 2016

Geachte heer van Loveren,

Het Dagelijks Bestuur van de Medisch Ethische Toetsingscommissie VU medisch centrum heeft uw onderzoek **De WITGEBIT App ter bevordering van de mondhygiëne** besproken in de vergadering van 12/04/2016.

Het onderzoek valt niet onder de reikwijdte van de Wet Medisch-wetenschappelijk Onderzoek met mensen (WMO).

Het oordeel is gebaseerd op de volgende documenten:

|     |                            |                                        |
|-----|----------------------------|----------------------------------------|
| A1  | aanbiedingsbrief           | d.d. 4-4-2016                          |
| A1  | commentaar METc            | d.d. 20-4-2016                         |
| A1  | reactie op commentaar METc | d.d. 17-5-2016                         |
| B25 | privacyverklaring          | getekend d.d. 4-4-2016                 |
| C1  | onderzoeksprotocol         | versie 1 d.d. 4-4-2016                 |
| E11 | informatiebrief            | versie 1 d.d. 4-4-2016 ouder/verzorger |
| E11 | informatiebrief            | versie 1 d.d. 4-4-2016 deelnemer       |
| E2  | toestemmingsverklaring     | versie 1 d.d. 4-4-2016 deelnemer       |
| E2  | toestemmingsverklaring     | versie 1 d.d. 4-4-2016 ouder/verzorger |
| F1  | vragenlijst                | versie 1 d.d. 4-4-2016 deel 1          |
| F1  | vragenlijst                | versie 1 d.d. 4-4-2016 deel 2          |
| F1  | vragenlijst                | versie 1 d.d. 4-4-2016 deel 3          |

Het Dagelijks Bestuur van de Medisch Ethische Toetsingscommissie VU medisch centrum wijst u erop dat hoewel het ingediende onderzoek niet onder de reikwijdte van de WMO valt, andere wet- en regelgeving (mogelijk) wel van toepassing is, waaronder:

- WGBO (Wet Geneeskundige BehandelingsOvereenkomst);
- WBP (Wet Bescherming Persoonsgegevens), zie [www.cbppweb.nl](http://www.cbppweb.nl);
- Code Goed Gedrag (Gedragscode gezondheidsonderzoek: gebruik medische gegevens in wetenschappelijk onderzoek), zie [www.federa.org](http://www.federa.org);
- Code Goed Gebruik (Gedragscode Verantwoord omgaan met lichaamsmateriaal ten behoeve van wetenschappelijk onderzoek, 2011), zie [www.federa.org](http://www.federa.org);
- Reglement VUmc Nader gebruik lichaamsmateriaal, zie KwaliteitsNet VUmc, document 046913, versie 2;

- Overdrachtsovereenkomst van lichaamsmateriaal, zie <http://www.vumc.nl/afdelingen/METc/wetgeving/lichaamsmateriaal/>;
- Biobanken: Tijdelijke regeling 'de novo' biobanken (METc VUmc 2012), zie [http://www.vumc.nl/afdelingen/METc/wmo-oordeel/soorten\\_onderzoek/tijdelijke\\_regeling\\_biobanken/](http://www.vumc.nl/afdelingen/METc/wmo-oordeel/soorten_onderzoek/tijdelijke_regeling_biobanken/);
- WBO (Wet Bevolkings Onderzoek), zie <http://www.vumc.nl/afdelingen/METc/wetgeving/wetbevolkingsonderzoek/>.

To whom it may concern

We are pleased to confirm that the Medical Research Involving Human Subjects Act (WMO) does not apply to the above mentioned study and that an official approval of this study by our committee is not required.

The Medical Ethics Review Committee of VU University Medical Center is registered with the US Office for Human Research Protections (OHRP) as IRB00002991. The FWA number assigned to VU University Medical Center is FWA00017598.

Met vriendelijke groet,  
namens de Medisch Ethische Toetsingscommissie VU medisch centrum,

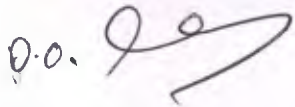

prof. dr. J.A. Rauwerda, voorzitter

c.c.: J.F.M. Scheerman / [j.f.m.scheerman@acta.nl](mailto:j.f.m.scheerman@acta.nl)
