# Supplementary material for: Study protocol of a randomized controlled trial to test the effect of a smartphone application on oral-health behavior and oral hygiene in adolescents with fixed orthodontic appliances
Source: PubMed Central journal article supplement (PMC5803887; doi:10.1186/s12903-018-0475-9), 2018-02-07

|           |                                                                                                                      |                              |
|-----------|----------------------------------------------------------------------------------------------------------------------|------------------------------|
| Division  | : Research Institute ACTA                                                                                            | Liam Messin PhD              |
| Phone     | : +31 20 5980641                                                                                                     | Editor                       |
| Contact   | : Dr. T.J.M. van Steenbergen                                                                                         | <i>BMC-series Journals</i>   |
| Email     | : t.van.steenbergen@acta.nl                                                                                          | BioMed Central               |
| Date      | : January 10, 2018                                                                                                   | Floor 6, 236 Gray's Inn Road |
| Reference | : MvS                                                                                                                | London, WC1X 8HL             |
| Subject   | : Trial to Test the Effect of a Smartphone<br>Application on Oral-health behavior and Oral<br>Hygiene in Adolescents | UK                           |

Dear dr. Messin,

Herewith I declare that the trial related to the study protocol "Study Protocol of a Randomized Controlled Trial to Test the Effect of a Smartphone Application on Oral-health behavior and Oral Hygiene in Adolescents with Fixed Orthodontic Appliances" (OHEA-D-17-00008) will be financed by the Academic Centre for Dentistry Amsterdam (ACTA), University of Amsterdam and Vrije Universiteit Amsterdam, and InHolland University of applied sciences.

Your sincerely,

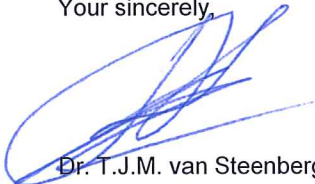

Dr. T.J.M. van Steenbergen  
Research Coordinator ACTA

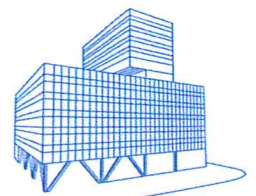

Supplement: 12903_2018_475_MOESM8_ESM.pdf [file 12903_2018_475_MOESM8_ESM.pdf]
